# Supplementary material for: Synthesis of hybrid zinc/silyl acrylate copolymers and their surface properties in the microfouling stage
Source: Royal Society of Chemistry journal article supplement (doi:10.1039/c5ra24270c), 2016-01-01
Supplement: c5ra24270c1.pdf [file c5ra24270c1.pdf]

## Supporting information

### **Synthesis of Hybrid Zinc/Silyl Acrylate Copolymers and their Surface Properties in the Microfouling Stage**

Rongrong Chen,<sup>a,b</sup> Yakun Li,<sup>a</sup> Minglong Yan,<sup>a</sup> Xun Sun,<sup>a</sup> Huajing Han,<sup>a</sup> Jie Li,<sup>a</sup> Jun Wang,<sup>a,b</sup> Lianhe Liu,<sup>\*a,c</sup> Kazunobu Takahashi,<sup>\*a</sup>

---

*a. Key Laboratory of Superlight Material and Surface Technology, Ministry of Education, Harbin Engineering University, 150001, China*

*b. Institute of Advanced Marine Materials, College of Materials Science and Chemical Engineering, Harbin Engineering University, Harbin 150001, China*

*c. Qingdao Advanced Marine Material Technology Co., Ltd, Qingdao, 266100, China*

\* To whom correspondence should be addressed. E-mail: liulianhe@hrbeu.edu.cn; kazunobu@163.com

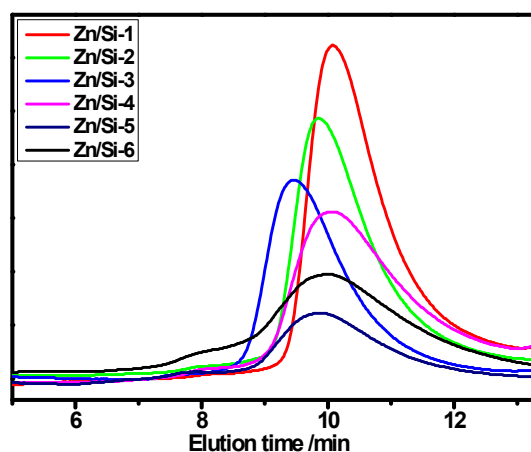

Figure S1. GPC (THF) chromatograms of the Zn/Si-acrylate copolymers.

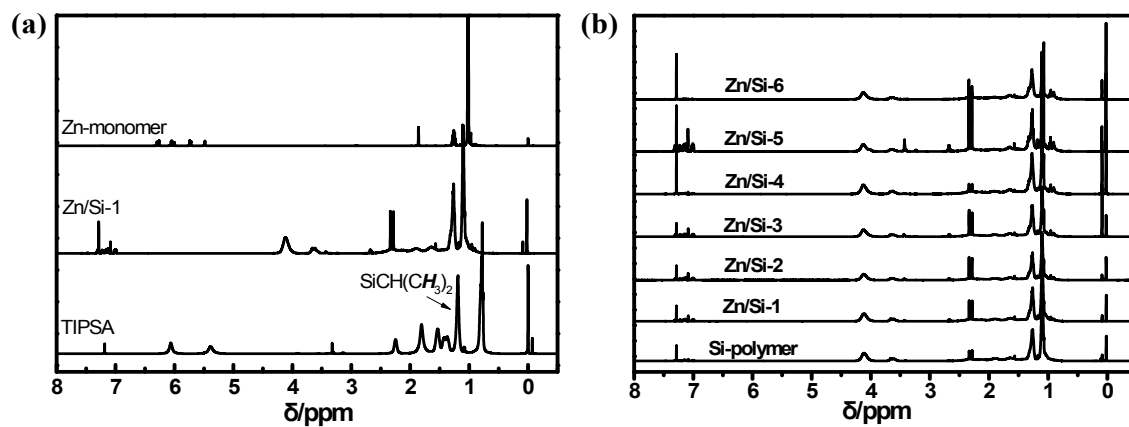

Figure S2.  $^1\text{H}$  NMR spectra of TIPSA, Zn-monomer and Zn/Si-1 (a).  $^1\text{H}$  NMR spectra for the Zn/Si-acrylate copolymers (b).
